# Supplementary material for: Superhydrophobic and oleophobic luminescent composite materials for oxygen sensing in fuel-laden atmospheres
Source: Royal Society of Chemistry journal article supplement (doi:10.1039/d4ta06848c), 2025-01-01
Supplement: d4ta06848c1.pdf [file d4ta06848c1.pdf]

## Supporting Information

### Superhydrophobic and oleophobic luminescent composite materials for oxygen sensing in fuel-laden atmospheres

Yawen Zhao, Fajin Qu, Zhiwen Wang, Yanyi Wang, Chusheng Chen\*

CAS Key Laboratory of Precision and Intelligent Chemistry and Department of Materials Science and Engineering, University of Science and Technology of China, Hefei, 230026, China.

\* Corresponding author: ccsn@ustc.edu.cn.

**Figure S1** illustrates the UV absorption spectrum of the PtTFPP dispersed in PDMS, showing the Soret band at 389 nm along with two Q bands at 506 nm and 538 nm. Based on this absorption spectrum, a UV LED with a wavelength of 390 nm was used as the excitation light source.

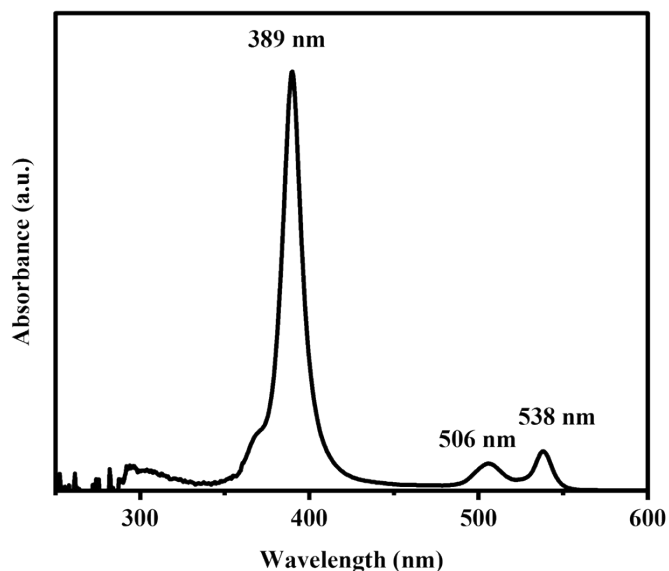

**Figures S1.** The UV absorption spectra of the PtTFPP-PDMS sol solution.
